# Supplementary material for: Separation of ReO4 −/TcO4 − from simulated radioactive waste liquid by a novel series of anion exchange resins
Source: publisher site journal article supplement (doi:10.1515/ract-2023-0261), 2024-03-28
Supplement: Supplementary file 1 [file j_ract-2023-0261_suppl_001.docx]

Electronic Supporting information

**Separation of ReO4-/TcO4- from simulated radioactive waste liquid by a novel series of anion exchange resins**

Yiwei Huanga,c, Xinlong Chena, Yinglin Shena*, Xiaomin Lia, Xupeng Zhia, Peng Liua, Meiying Liua, Bin Liu*a,b

a School of Nuclear Science and Technology, Lanzhou university, Lanzhou 730000, China

b School of Stomatology, Lanzhou University, Lanzhou 730000, China

c Department Nuclear Medicine,Wuhan University, Zhongnan Hospital, Wuhan 430071, China

**Preparation of MAGD-1 anion exchange resin**

MIMDIDOA ionic liquid was synthesized with reference to previous literature. 1.2 g of 60-80 mesh diatomaceous earth was dried at 65°C for 12 h to remove water and volatiles. It was then mixed with 0.8 g of MIMDIDOA ionic liquid in a 50 mL centrifuge tube, dissolved in 10 mL of methanol and stirred at 25°C for 18 hours. The solvent was removed by distillation in vacuum and dried at 65°C to yield MAGD-1 anion exchange resin as shown in **Scheme 2.**

**Preparation of MAPE-1 anion exchange resin**

1.2 g of 200 mesh dried AmberchromCG71resin together with 0.8 g of ionic liquid, 10 mL of methanol were added to a 50 mL centrifuge tube and was shaken for 18 h at 25°C. The solvent was removed by distillation in vacuum and dried at 65°C to obtain MAPE-1 resin as shown in **Scheme 2**.

**Preparation of MAPE-2 anion exchange resin**

1.2g of dried resin, 0.8 g of ionic liquid, 10 mL of methanol were added to a 50 mL centrifuge tube, respectively, and shaking at 25°C for 18 hours. The solvent was removed by distillation in vacuum and dried at 65°C to obtain MAPE-2 resin as shown in **Scheme 2**.

**Preparation of MAPE-3 anion exchange resin**

1.2 g of 200-mesh dried AmberchromCG71 resin and 0.8 g of MIMDIDTA ionic liquid were added with 10 mL of methanol in a 50 mL centrifuge tube and shaken for 18 h at 25°C. The solvent was removed by distillation in vacuum and dried at 65°C to obtain MAPE-3 resin as shown in **Scheme 2**.


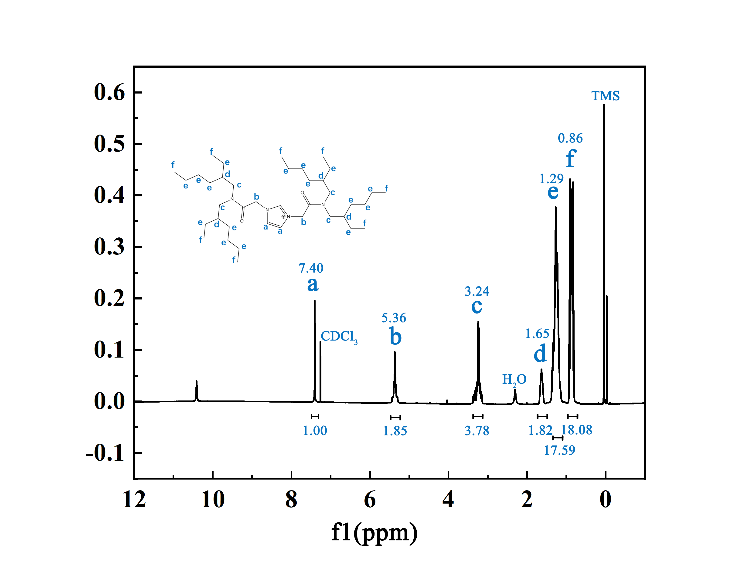


**Fig. S1** 1H-NMR for MIMDIDOA
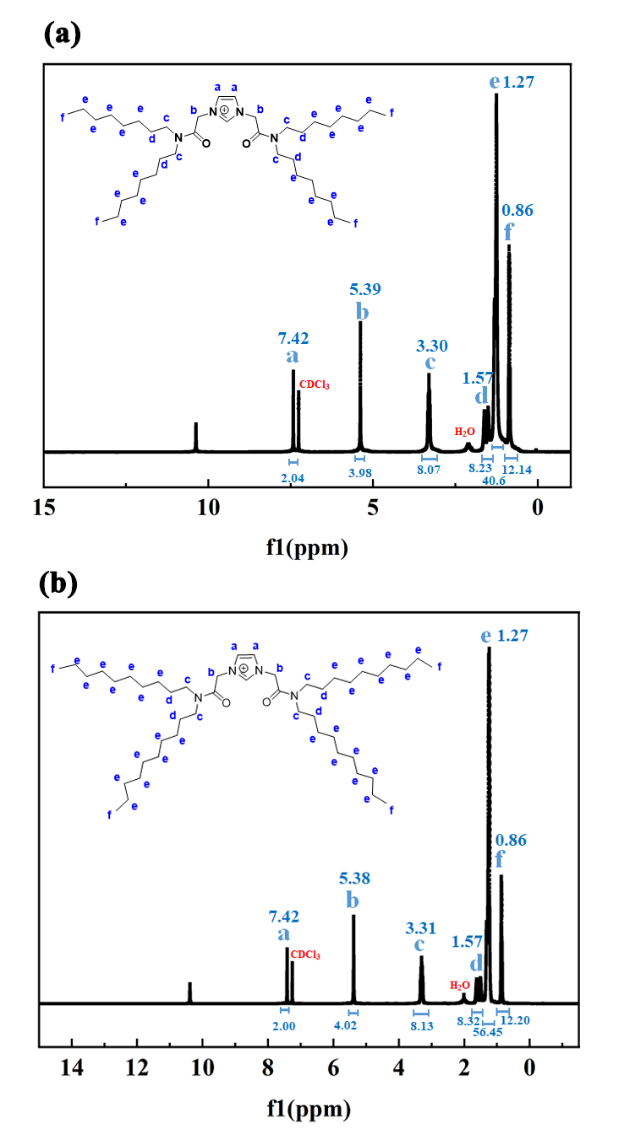


**Fig. S2** (a) 1H NMR for MIMDIDEA; (b) 1H NMR for MIMDIDTA


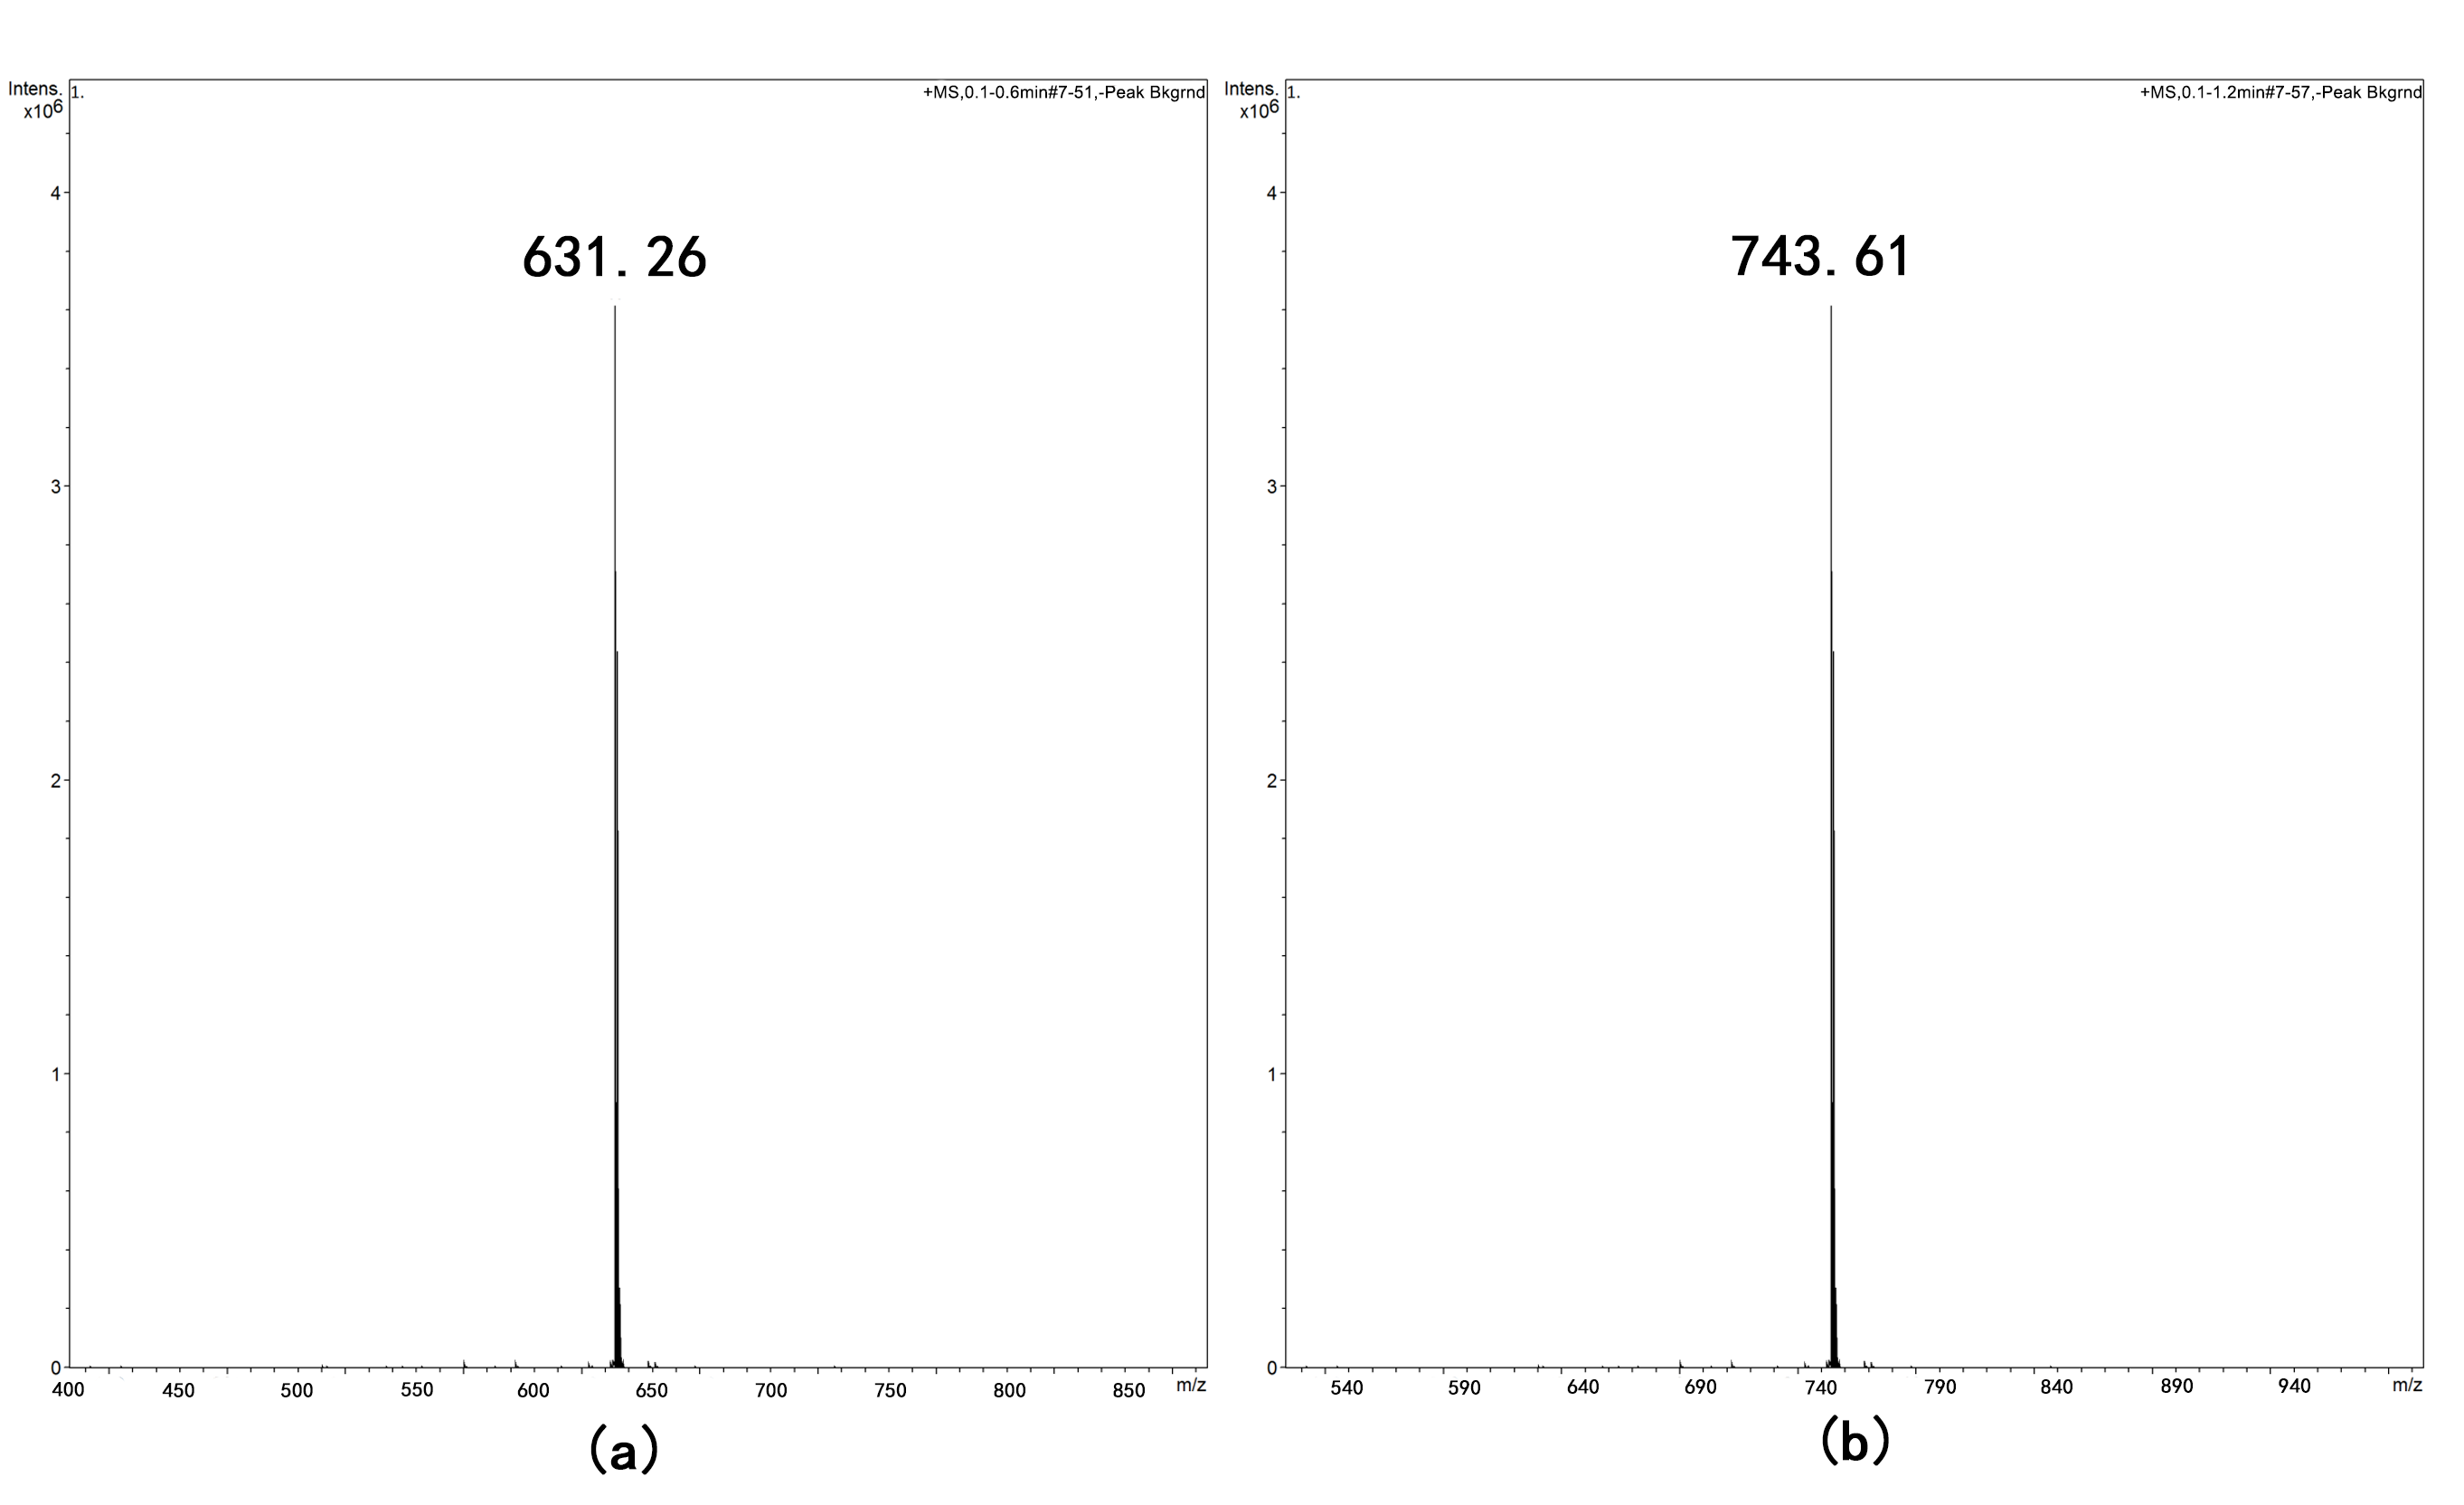


**Fig. S3** (a)Cation electrospray mass spectrometry of MIMDIDEA; (b)Cation electrospray mass spectrometry of MIMDIDTA


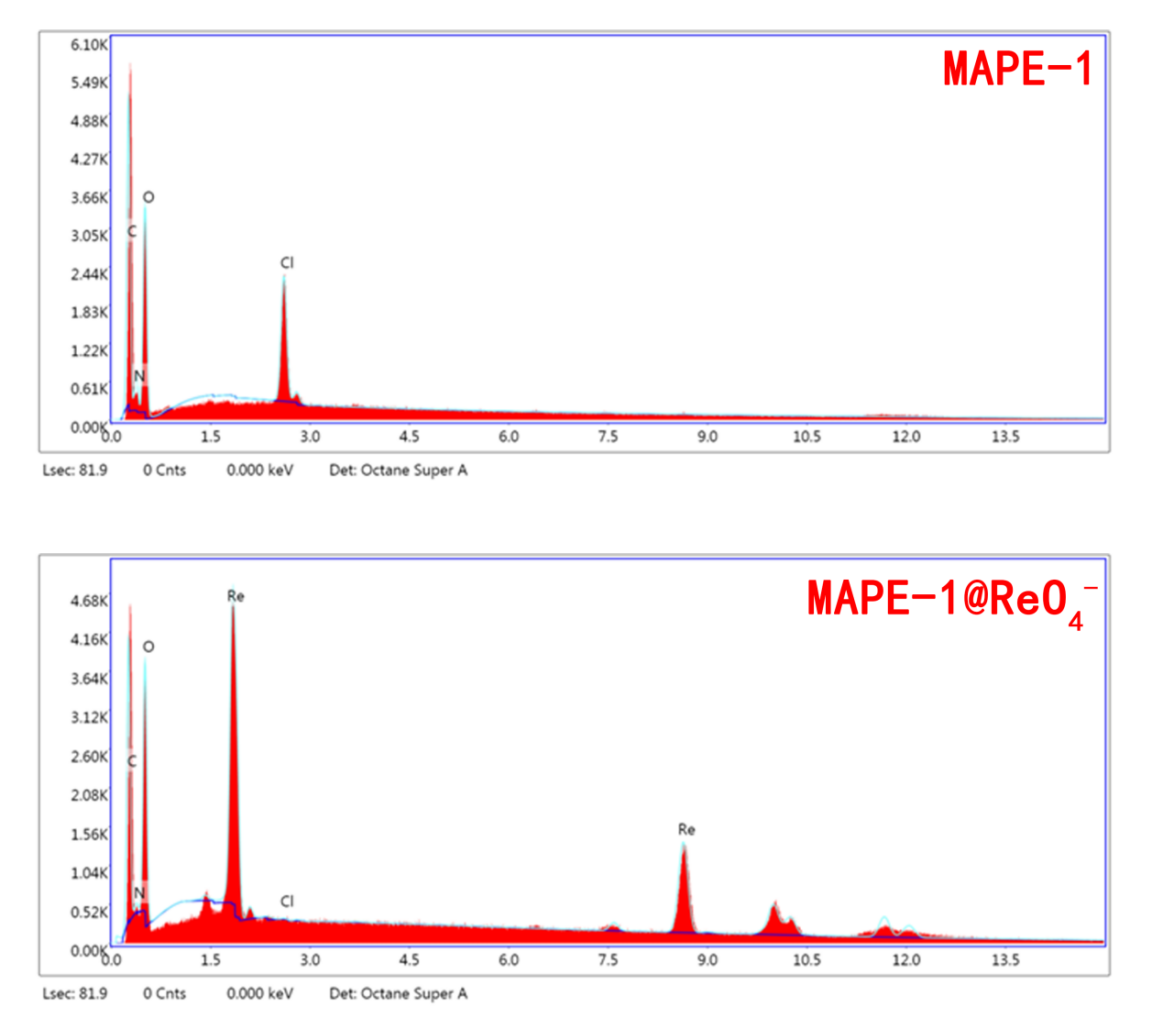


**Fig. S4** The EDS spectra of MAPE-1 and MAPE-1@ReO4-
